# Supplementary material for: Investigations on the reciprocal ternary system (±)-2-phenylpropionic acid–(±)-α-methylbenzylamine. Impact of an unstable racemic compound on the simultaneous resolution of chiral acids and bases by preferential crystallisationElectronic supplementary information (ESI) available: examination of the crystal growth paths for racemic solutions and the case of non-racemic solutions—application to the PC. See http://www.rsc.org/suppdata/p2/b1/b100706h/Glossary: A Acidic ion. A Configuration of a ladder; the chiral ion(s) of the ion pair at the top has (have) the right absolute configuration. AS3PC Auto-seeded programmed polythermic preferential crystallisation. B Basic ion. c Concentration. csat Concentration of a saturated solution. conglo Conglomerate. CCI Chiral counter-ion. DIPE Diisopropyl ether. eefmax Maximum ee of the mother liquor at the end of the entrainment effect. E Percentage of rungs formed [= (i – 2q)/i]. EhklP/N Set of ratios of the homochiral (R–R or S–S) interaction energ
Source: Royal Society of Chemistry journal article supplement (doi:10.1039/b100706h), 2001-09-07
Supplement: b100706h.doc [file b100706h.doc]

# Supplementary data

Examination of the crystal growth paths for racemic solutions

**NCCI, racemic compound.** The elementary branches (scheme 1) of the tree diagram (figure 1) are quite different:

- in configuration *A*, both the right and the wrong enantiomers can be adsorbed with a probability of 0.5 each.
- In configuration *Z*, either a right pair is inserted with a probability of 0.5 (noted +1*A* because a right pair at the top is retrieved), or the wrong pair is desorbed (-1*A*).

*A*

+1*A*

+1*Z*

0.5

0.5

*Z*

+1*A*

-1*A*

0.5

0.5

**Scheme 1**Possible evolutions of an IPBC (with their probabilities) in the case of the ***racemic******compound***with***NCCI***, depending on the configuration (*A* or *Z*) of the ionic pair at the top.

(0*A*)

(1*A*)

(3*A*)

(3*Z*)

(2*A*)

(3*A*)

(1*A*)

(2*Z*)

(1*Z*)

(3*A*)

(3*Z*)

(2*A*)

(1*A*)

(1*Z*)

(0*A*)

0..5

0..5

1/4

1/8

1/8

1/8

1/8

1/4

1/4

1/8

1/8

1/8

1/4

1/8

(4*A*)

(4*Z*)

(4*A*)

(2*A*)

(4*A*)

(4*Z*)

(2*A*)

(2*Z*)

(4*A*)

(4*Z*)

(4*A*)

(2*A*)

(2*A*)

(2*Z*)

(2*A*)

(0*A*)

1/16

1/16

+1*Z*

1/16

1/16

1/16

-1vvvvv

1/16

1/16

1/16

1/16

1/16

1/16

1/16

1/16

1/16

1/16

1/16

Event

1

2

3

4

**Fig. 1**Tree diagram of all the possible “crystal growth paths” after 4 events in the case of the ***racemic******compound*** with ***NCCI***. The probability of each crystal growth path (on the arrows) precedes the obtained situation of the ladder [*i.e.* the number of rungs formed and the absolute configuration of the ionic pair at the top (*A* or *Z* according to the notations previously introduced in the article)].

The equations necessary to construct the corresponding triangular table (table 1) can be deduced from scheme 1: a situation (x*A*) is obtained from (x-1*A*), (x-1*Z*) and (x+1*Z*). A situation (x*Z*) can only be obtained from (x-1*A*). By using the same notations i, j and Ui, j these equations are:

Ui, j = 0.5 Ui-1, j-1 + 0.5 Ui-1, j + 0.5 Ui-1, j+1 j odd (eq.1);

Ui, j = 0.5 Ui-1, j-1 j even (eq.2).

| Number of  events i. | j | | | | |
| --- | --- | --- | --- | --- | --- |
| 1 | 2 | 3 | 4 | 5 |
| 0 | 1 (0*A*) |  |  |  |  |
| 1 | 1/2 (1*A*) | 1/2 (1*Z*) |  |  |  |
| 2 | 1/2 (2*A*) | 1/4 (2*Z*) | 1/4 (0*A*) |  |  |
| 3 | 3/8 (3*A*) | 1/4 (3*Z*) | 1/4 (1*A*) | 1/8 (1*Z*) |  |
| 4 | 5/16 (4*A*) | 3/16 (4*Z*) | 5/16 (2*A*) | 1/8 (2*Z*) | 1/16 (0*A*) |

**Table 1** The possibly obtained situations of the ladder are preceded by the sum of the probabilities of all the paths leading to these situations. For instance, when 4 events are realised, the formation of 2 rungs with the right one at the top (2*A*) has a probability of 5/16th (5 crystal growth paths of 1/16th probability each).

The graph Pi-2q = f(E) is also a gaussian-type peak but centred on E() = 66.7% (figure 2). The more i increases, the more probable the formation of 2/3i rungs.

**Fig.2** Curve obtained in the case of the racemic compound with NCCI for 10000 events in a racemic solution.

**CCI, conglomerate.** When both the acid and the base are chiral, there are four possibilities for the pair at the top:

- the absolute configurations of both ions are that required: the ladder is in configuration *A*.
- The absolute configurations of both ions are not that required: the ladder is in configuration *Z*.
- The absolute configuration of only one ion is not that required (the acid for example): the ladder is in configuration *M*.
- The absolute configuration of the other ion (the base in that case) is not that required: the ladder is in configuration *N*.

Consequently, there are four elementary branches necessary to construct the tree diagram and/or the corresponding triangular table (scheme 2):

**Scheme 2**Possible evolutions of an IPBC (with their probabilities) in the case of the ***conglomerate***with***CCI***, depending on the configuration (*A*, *M*, *N* or *Z*) of the ionic pair at the top.

*A*

+1*A*

+1*Z*

+1*M*

+1*N*

0.25

0.25

0.25

0.25

*M*

-1*A*

+1*MM*

+1*Z*

0.25

0.5

0.25

*N*

-1*A*

+1*NM*

+1*Z*

0.25

0.5

0.25

*Z*

-1*A*

1.0

In configuration *A*, each of the four possible pairs can be adsorbed with the same probability 0.25 since there is no chiral recognition in the liquid or solution state and each pair exists statistically with the same probability.

In configuration *Z*, the desorption of the wrong pair is compulsory. Whatever the pair involved in a possible F3D1 or F2D0 mechanism, the rung before last is made up of at least one ion of wrong absolute configuration, so that the only solution is the desorption of this wrong pair.

In configuration *M*, there are two pairs containing the right carboxylic ion to be inserted; both lead to the formation of one additional rung but one in configuration *Z* (+1*Z*) (the probability of this event is 0.25), and the other in configuration *M* (+1*M*) (also a probability of 0.25) (see organisation chart 3 in the article). The third possible evolution is the desorption of the wrong pair (-1*A*) which can be due to the fact that a pair with a wrong carboxylic ion was docked as explained in the article (there is a probability of 0.5).

In configuration *N*, the same possible evolutions can be contemplated.

The recurrence which allows to construct the corresponding triangular table (table 2) is also deduced from scheme 2.

Configuration (x*A*) can arise from:

- (x-1)*A* with a probability of 0.25.
- (x+1)*M* with a probability of 0.5.
- (x+1)*N* with a probability of 0.5.
- (x+1)*Z* with a probability of 1.0.

So that Ui, j = 0.25 Ui-1, j + 0.5 Ui-1, j-3 + 0.5 Ui-1, j-2 + Ui-1, j-1 if j = 1+4n (nN) (eq.3) in table 2.

Configuration (x*M*) can arise from:

- (x-1*A*) with a probability of 0.25.
- (x-1*M*) with a probability of 0.25.

So that Ui, j = 0.25 Ui-1, j + 0.25 Ui-1, j-1 if j = 2+4n (nN) (eq.4).

Configuration (x*N*) can arise from:

- (x-1*A*) with a probability of 0.25.
- (x-1*N*) with a probability of 0.25.

So that Ui, j = 0.25 Ui-1, j + 0.25 Ui-1, j-2 if j = 3+4n (nN) (eq.5).

Configuration (x*Z*) can arise from:

- (x-1*A*) with a probability of 0.25.
- (x-1*M*) with a probability of 0.25.
- (x-1*N*) with a probability of 0.25.

So that Ui, j = 0.25 Ui-1, j-3 + 0.25 Ui-1, j-2 + 0.25 Ui-1, j-1 if j = 4+4n (nN) (eq.6).

The probability of each possible situation can now be calculated by means of these four equations, completing the table 2 row after row.

| Number of events i | j | | | | | | | | |
| --- | --- | --- | --- | --- | --- | --- | --- | --- | --- |
| 1 | 2 | 3 | 4 | 5 | 6 | 7 | 8 | 9 |
| 0 | 1  (0*A*) |  |  |  |  |  |  |  |  |
| 1 | 0.25  (1*A*) | 0.25  (1*M*) | 0.25  (1*N*) | 0.25  (1*Z*) |  |  |  |  |  |
| 2 | 0.0625  (2*A*) | 0.125 (2*M*) | 0.125 (2*N*) | 0.1875  (2*Z*) | 0.5  (0*A*) |  |  |  |  |
| 3 | 0.015625 (3*A*) | 0.046875 (3*M*) | 0.046875 (3*N*) | 0.078125 (3*Z*) | 0.4375 (1*A*) | 0.125 (1*M*) | 0.125 (1*N*) | 0.125 (1*Z*) |  |
| 4 | 0.00390625 (4*A*) | 0.015625 (4*M*) | 0.015625 (4*N*) | 0.02734375 (4*Z*) | 0.234375 (2*A*) | 0.140625 (2*M*) | 0.140625 (2*N*) | 0.171875 (2*Z*) | 0.25 (0*A*) |

# Table 2 Triangular table corresponding to all the possible situations of a ladder with respect to the number of events i, in the case of the conglomerate with CCI

Once again the curves Pi-2q = f(E) are gaussian-type peaks but E() = 28%; E decreases when i increases.

**CCI, -type racemic compound.** In configuration *A* and *Z*, the same evolutions as those found for the conglomerate are possible. The only difference lies in configuration *M* or *N*. The insertion of one of the two pairs containing the ion of required absolute configuration leads to the configuration *A* (+1*A*), instead of leading to the configuration *Z* (+1*Z*) (see organisation chart 4 in the article) (scheme 3).

**Scheme 3** Possible evolutions of an IPBC (with their probabilities) in the case of the ***racemic compound***with***CCI***, depending on the configuration (*A*, *M*, *N* or *Z*) of the ionic pair at the top.

*A*

+1*A*

+1*Z*

+1*M*

+1*N*

0.25

0.25

0.25

0.25

*M*

-1*A*

+1*MM*

+1*A*

0.25

0.5

0.25

*N*

-1*A*

+1*NM*

+1*A*

0.25

0.5

0.25

*Z*

-1*A*

1.0

Therefore, situation (x*A*) can arise from:

- (x-1*A*) with a probability of 0.25.
- (x-1*M*) with a probability of 0.25.
- (x+1*M*) with a probability of 0.5.
- (x-1*N*) with a probability of 0.25.
- (x+1*N*) with a probability of 0.5.
- (x+1*Z*) with a probability of 1.0.

So that Ui, j = 0.25Ui-1, j+0.25Ui-1, j+1+0.5Ui-1, j-3+0.25Ui-1, j+2+0.5Ui-1, j-2+Ui-1, j-1 if j = 1+4n (nN) (eq.8).

Situation (x*M*) can arise from:

- (x-1*A*) with a probability of 0.25.
- (x-1*M*) with a probability of 0.25.

So that Ui, j = 0.25Ui-1, j-1+0.25Ui-1, j if j = 2+4n (nN) (eq.9).

Situation (x*N*) can arise from:

- (x-1*A*) with a probability of 0.25.
- (x-1*N*) with a probability of 0.25.

So that Ui, j = 0.25Ui-1, j-2+0.25Ui-1, j if j = 3+4n (nN) (eq.10).

Situation (x*Z*) can arise from (x-1*A*) with a probability of 0.25 so that Ui, j = 0.25Ui-1, j-3  if j = 4+4n (nN) (eq.11).

The peak of the graph Pi-2q = f(E) is centred on E() = 39%. E is still greater than in the case of the conglomerate.

Figure 3 allows to compare the results obtained in the four cases.

Fig 3Pi-2q = f(E) curves obtained for 10000 events. (a) NCCI-conglomerate; (b) NCCI-racemic compound; (c) CCI-conglomerate; (d) CCI-racemic compound.

(c)

(a)

(d)

(b)

**The case of non racemic solutions. Application to the P.C.**

**NCCI.** Each value of ee corresponds to a composition of both enantiomers in the mother liquor. This composition determines the values of the probabilities of each mechanism in the different configurations *A* or *Z* of the ionic pair at the top (table 3 and scheme 4).

| **ee** (%) | Composition of the solute | |
| --- | --- | --- |
| Proportion of R enantiomer (**fR**) | Proportion of S enantiomer (**fS**) |
| 0 | 0.5 | 0.5 |
| 5 | 0.525 | 0.475 |
| 10 | 0.55 | 0.45 |
| 15 | 0.575 | 0.425 |
| 20 | 0.6 | 0.4 |
| 30 | 0.65 | 0.35 |
| 40 | 0.7 | 0.3 |
| 50 | 0.75 | 0.25 |

**Table 3** Proportion of both enantiomers in an enantiomerically enriched solution. The values fR and fS determine the probabilities used in the elementary branches (scheme 4).

fR

fS

*A*

+1*A*

+1*Z*

*Z*

+1*A*

-1*A*

fS

fR

***Scheme 4***Elementary branches necessary to construct the tree diagrams and/or the “triangular tables” corresponding to the crystallisation of **(a), (b)**: the **racemic compound** and **(c)**: the **enantiomer** (with ***NCCI***) initially in excess in the mother solution (ABR for instance). (a): configuration *A* corresponds to the pair ABR at the top. (b): configuration *A* corresponds to ABS at the top. The probability of each event is determined by the proportion of both enantiomers in the mother solution (table 3).

**(a)**

**(b)**

fS

fR

*A*

+1*A*

+1*Z*

*Z*

+1*A*

-1*A*

fR

fS

**(c)**

fR

fS

*A*

+1*A*

+1*Z*

*Z*

+1*Z*

-1*A*

fR

fS

The recurrence allowing to construct the “triangular tables” is deduced from these elementary branches:

*The enantiomer (ABR). S*ituation (x*A*) can arise from (x-1*A*) with the probability fR.

(x+1*Z*) with the probability fS.

so that Ui, j = fR Ui-1, j + fS Ui-1, j-1 if j is odd.

situation (x*Z*) can arise from (x-1*A*) with the probability fS.

(x-1*Z*) with the probability fR.

so that Ui, j = fS Ui-1, j-1 + fR Ui-1, j if j is even.

Finally Ui, j = fS Ui-1, j-1 + fR Ui-1, j  i,  j (eq.12).

*The racemic compound*. Let be (0*A*) the initial situation corresponding to the pair ABR at the top. Situation (i*A*) corresponds to the pair ABS at the top if i is odd (for 1, 3,…events),

and ABR at the top if i is even (for 2, 4,…events) (table 4).

| Number of  events i. | j | | | | |
| --- | --- | --- | --- | --- | --- |
| 1 | 2 | 3 | 4 | 5 |
| 0 | R (0*A*) |  |  |  |  |
| 1 | S (1*A*) | R (1*Z*) |  |  |  |
| 2 | R (2*A*) | S (2*Z*) | R (0*A*) |  |  |
| 3 | S (3*A*) | R (3*Z*) | S (1*A*) | R (1*Z*) |  |
| 4 | R (4*A*) | S (4*Z*) | R (2*A*) | S (2*Z*) | R (0*A*) |

# Table 4 Absolute configuration of the chiral ion at the top, with respect to the situation of the ladder, in the case of the racemic compound.

Therefore,

- **if i is even**, situation (x*A*) can arise from (refer to scheme 14b since i-1 is odd and ABS is at the top):

(x-1*A*) with the probability fR

(x-1*Z*) with the probability fS

(x+1*Z*) with the probability fR.

situation (x*Z*) can arise from (x-1*A*) with the probability fS

so that Ui, j = fR Ui-1, j + fS Ui-1, j+1 + fR Ui-1, j-1 if **j is odd** (eq.13),

and Ui, j = fS Ui-1, j-1 if **j is even** (eq.14) (table 4).

- **If i is odd** (refer to scheme 14(a) since i-1 is even), situation (x*A*) can arise from:

(x-1*A*) with the probability fS

(x-1*Z*) with the probability fR

(x+1*Z*) with the probability fS.

situation (x*Z*) can arise from (x-1*A*) with the probability fR

so that Ui, j = fS Ui-1, j + fR Ui-1, j+1 + fS Ui-1, j-1 if **j is odd** (eq.15).

and Ui, j = fR Ui-1, j-1 if **j is even** (eq.16).

For each value of ee, the corresponding “triangular tables” are constructed on the basis of these formulae of recurrence. In the same way as for the racemic solutions, the graphs Pi-2q = f(E) are gaussian-type peaks. In both cases (racemic compound and enantiomer), E() evolves with respect to the ee (figure 10 in the article).

**CCI.** The double decomposition equilibrium (1) is used to determine the proportions of each pair in the mother liquor: ARBR + ASBS  ARBS + ASBR (1)

If a and b are the fraction of  and ’ salts initially introduced in the solution, (a-m) = k, (b-m) = l and m are the mass fraction of , ’ and  or ’ pairs respectively at the equilibrium, so that

K = m²/[(a-m)(b-m)] = 1 and m = ab/(a+b). The values of a, b, m, k and l are collected in table 5.

| **ee (%)** | **a** | **b** | **k** | **l** | **m** |
| --- | --- | --- | --- | --- | --- |
| 3 | 51.5 | 48.5 | 0.265225 | 0.235225 | 0.249775 |
| 6 | 53 | 47 | 0.2809 | 0.2209 | 0.2491 |
| 9 | 54.5 | 45.5 | 0.297025 | 0.207025 | 0.247975 |
| 12 | 56 | 44 | 0.3136 | 0.1936 | 0.2464 |
| 15 | 57.5 | 42.5 | 0.330625 | 0.180625 | 0.244375 |
| 20 | 60 | 40 | 0.36 | 0.16 | 0.24 |

**Table 5** Proportion of  (k), ’ (l),  (m) and ’ (m) pairs in the mother solution for several ee of  salt (calculated by means of the constant of the equilibrium of double decomposition (K = 1)). These values also give the probabilities of the mechanisms involving the corresponding ionic pairs. When ’ pairs become predominant in the mother solution (because of the P.C. of  salt), a and b and therefore k and l must be inverted in the elementary branches.

*Case of the enantiomer.* We still consider the crystallisation of the enantiomer in excess ( salt according to the example of table 5). “Triangular tables” can now be constructed by means of the elementary branches of scheme 5.

**Scheme 5**Elementary branches of the tree diagram describing the crystallisation of an IPBC of the enantiomer in excesswith***CCI*** (ARBR). The probability of each event is determined by the proportion of each ionic pair in the mother solution (table 14).

*A*

+1*A*

+1*Z*

+1*M*

+1*N*

m

l

m

k

*M*

-1*A*

+1*MM*

+1*Z*

m

l+m

k

*N*

-1*A*

+1*NM*

+1*Z*

m

l+m

k

*Z*

-1*A*

1.0

In configuration *A*, there are four possible mechanisms:

- The adsorption of the right pair ARBR (+1*A*) with the probability k.
- The adsorption of the wrong pair ASBS (+1*Z*) with the probability l.
- The adsorption of ASBR (+1*M*) with the probability m.
- The adsorption of ARBS (+1*N*) with the probability m.

In configuration *M* (ASBR at the top), three mechanisms are possible:

- The insertion of ARBR (+1*M*) with the probability k.
- The insertion of ARBS (+1*Z*) with the probability m.
- The third possible evolution is the desorption of the wrong pair which can be interpreted as the docking of a wrong pair leading to a wrong carboxylate ion (AS) buried into the crystal so that the probability is l+m.

In configuration *N* (ARBS at the top), there are three symmetric possible mechanisms:

- The insertion of ARBR (+1*N*) with the probability k.
- The insertion of ASBR (+1*Z*) with the probability m.
- The desorption of the wrong pair with the probability l+m.

In configuration *Z*, the desorption of the wrong pair is compulsory (probability 1.0).

In the same way as for racemic solutions,

Situation (x*A*) can arise from: (x-1*A*) with the probability k.

(x+1*M*) with the probability l+m.

(x+1*N*) with the probability l+m.

(x+1*Z*) with the probability 1.0.

So that Ui, j = k Ui-1, j + (l+m) Ui-1, j-3 + (l+m) Ui-1, j-2 + Ui-1, j-1 if j = 1+4n (nN) (eq.17) (one can refer to table 2 to assess the subscripts of U values).

Situation (x*M*) can arise from: (x-1*A*) with the probability m.

(x-1*M*) with the probability k.

So that Ui, j = m Ui-1, j-1 + k Ui-1, j if j = 2+4n (nN) (eq.18).

Situation (x*N*) can arise from: (x-1*A*) with the probability m.

(x-1*N*) with the probability k.

So that Ui, j = m Ui-1, j-2 + k Ui-1, j if j = 3+4n (nN) (eq.19).

Situation (x*Z*) can arise from: (x-1*A*) with the probability l.

(x-1*M*) with the probability m.

(x-1*N*) with the probability m.

So that Ui, j = l Ui-1, j-3 + m Ui-1, j-2 + m Ui-1, j-1 if j = 4+4n (nN) (eq.20).

Equations 17 to 20 allow to construct recurrently the “triangular table” corresponding to the crystallisation of one enantiomer (with a CCI) out of a non racemic solution. The corresponding curve Pi-2q = f(E) still displays a gaussian-type peak. E() is determined for each value of ee (figure 10 in the article).

*Case of the -type racemic compound.* A racemic compound of -type is considered as for the organisation chart4 (IPBCs are made up of a syndiotactic arrangement of  and ’ pairs along the 21 axis). Therefore, configuration *A* can correspond to either  (ARBS) or ’ (ASBR) pair at the top; in order to simplify the development, we define the configurations *M* and *N* as  (ARBR) and ’ (ASBS) pairs at the top respectively. With these definitions, the three possible evolutions of an IPBC in configuration *M* (or *N*) have the same probabilities whatever the pair (ARBS or ASBR) below (scheme 6).

**Scheme 6**Possible evolutions of an IPBC in configuration *M* (ARBR at the top) for the racemic compound. The probabilities of these evolutions are the same in both cases (a) the ionic pair below is ARBS and (b) the ionic pair below is ASBR.

(b)

(a)

B**R**

A**SE**

B**R**

A**RS**

B**S**

A

B

A**RSSSS**

B**R**

B**R**

A**SRRR**

A**RS**

B**S**

A**RSSSS**

A

B

Insertion of ASBS (l).

+1*A*

+1*M*

Insertion of ASBR (m).

-1*A*

Wrong docking of ARBR or ARBS (k+m).

Insertion of ASBS (l).

+1*A*

+1*M*

Insertion of ARBS (m).

-1*A*

Wrong docking of ARBR or ASBR (k+m).

The same applies to configuration *N* so that the elementary branches of scheme 7 allow to construct the tree diagrams.

**Scheme 7**Elementary branches of the tree diagrams describing the crystallisation of an IPBC of the racemic compound(with***CCI***) out of a non racemic mother solution. The probability of each event is determined by the proportion of each ionic pair in the mother liquor (table 5).

*A*

*M*

*N*

*Z*

+1*A*

+1*Z*

+1*M*

+1*N*

l

m

k

m

-1*A*

+1*AM*

+1*M*

m

k+m

l

-1*A*

+1*AM*

+1*N*

m

l+m

k

-1*A*

1.0

Therefore, situation (x*A*) can arise from: (x-1*A*) with the probability m

(x-1*M*) with the probability l

(x+1*M*) with the probability k+m

(x-1*N*) with the probability k

(x+1*N*) with the probability l+m

(x+1*Z*) with the probability 1.0

So that Ui, j = mUi-1, j+lUi-1, j+1+(k+m)Ui-1, j-3+kUi-1, j+2+(l+m)Ui-1, j-2+Ui-1, j-1 if j=1+4n (nN) (eq.21).

Situation (x*M*) can arise from: (x-1*A*) with the probability k.

(x-1*M*) with the probability m.

So that Ui, j = kUi-1, j-1 + mUi-1, j if j = 2+4n (nN) (eq.22).

Situation (x*N*) can arise from: (x-1*A*) with the probability l.

(x-1*N*) with the probability m.

So that Ui, j = lUi-1, j-2 + mUi-1, j if j = 3+4n (nN) (eq.23).

Situation (x*Z*) can arise from: (x-1*A*) with the probability l.

So that Ui, j = mUi-1, j-3 if j = 4+4n (nN) (eq.24).

The corresponding triangular tables and the curves Pi-2q = f(E) are determined for each value of ee. The evolution of the more probable percentage of rungs formed E() with respect to ee is represented on figure 10 in the article.

*Case of the -type racemic compound.* As the aim is to compare the relative advantages of both racemic compound types over the conglomerate, the proportions of , ’,  and ’ pairs are the same as in the cases of the conglomerate and the -type racemic compound studied before. IPBCs are made up of a syndiotactic arrangement of  and ’ pairs along the 21 axes. Starting from an IPBC in configuration A (situation (0*A*)) with  pair at the top, the absolute configurations of the pair at the top are given for each possible situation of the ladder after 4 events (table 6). Configuration *A* corresponds to either  (ARBR) (if i is even) or ’ (ASBS) (if i is odd) pair at the top respectively.

| Number of events i | j | | | | | | | | |
| --- | --- | --- | --- | --- | --- | --- | --- | --- | --- |
| 1 | 2 | 3 | 4 | 5 | 6 | 7 | 8 | 9 |
| 0 | RR (0*A*) |  |  |  |  |  |  |  |  |
| 1 | SS (1*A*) | RS (1*M*) | SR (1*N*) | SS (1*Z*) |  |  |  |  |  |
| 2 | RR (2*A*) | RS (2*M*) | SR (2*N*) | SS (2*Z*) | RR (0*A*) |  |  |  |  |
| 3 | SS (3*A*) | RS (3*M*) | SR (3*N*) | SS (3*Z*) | SS (1*A*) | RS (1*M*) | SR (1*N*) | RR (1*Z*) |  |
| 4 | RR (4*A*) | RS (4*M*) | SR (4*N*) | SS (4*Z*) | RR (2*A*) | RS (2*M*) | SR (2*N*) | SS (2*Z*) | RR (0*A*) |

**Table 6** Absolute configuration of both ions (the acid first and the base) with respect to the possible situations of the ladder after 4 events, in the case of the -type racemic compound.

In that case, the elementary branches are different whether i is even (scheme 8) or odd (scheme 9).

BS

AR

BR

AS

BS

AR

BS

AS

BS

AS

BR

AS

BS

AS

BS

AS

*A*

*M*

*N*

*Z*

+1*A*

+1*Z*

+1*M*

+1*N*

m

k

m

l

-1*A*

+1*AM*

+1*M*

k

l+m

m

-1*A*

+1*AM*

+1*N*

k

l+m

m

-1*A*

1.0

**Scheme 8**Possible evolutions (with the corresponding probabilities) of a ladder of -type racemic compound when i is even *i.e.* when configuration A corresponds to ARBR at the top (if (0A) corresponds to ARBR at the top).

BR

AS

BS

AR

BR

AR

BS

AR

BR

AS

BR

AR

BR

AR

BR

AR

*A*

*M*

*N*

*Z*

+1*A*

+1*Z*

+1*M*

+1*N*

m

l

m

k

-1*A*

+1*AM*

+1*M*

l

k+m

m

-1*A*

+1*AM*

+1*N*

l

k+m

m

-1*A*

1.0

**Scheme 9**Possible evolutions (with the corresponding probabilities) of a ladder of -type racemic compound when i is odd *i.e.* when configuration *A* corresponds to ASBS at the top (if (0*A*) corresponds to ARBR at the top).

The equations used to calculate even rows of the corresponding triangular table must be deduced from scheme 9 since i-1 is odd.

Thus, when i is even, a situation (x*A*) can arise from: (-1*A*) with the probability k,

(-1*M*) with the probability m,

(+1*M*) with the probability k+m,

(-1*N*) with the probability m,

(+1*N*) with the probability k+m,

(+1*Z*) with the probability 1.0,

so that Ui, j = kUi-1, j+mUi-1, j+1+(k+m)Ui-1, j-3+mUi-1, j+2+(k+m)Ui-1, j-2+Ui-1, j-1 if j=1+4n (nN), i even (eq.25).

Situation (x*M*) can arise from: (x-1*A*) with the probability m,

(x-1*M*) with the probability l

So that Ui, j = mUi-1, j-1 + lUi-1, j if j = 2+4n (nN) , i even (eq.26).

Situation (x*N*) can arise from: (x-1*A*) with the probability m,

(x-1*N*) with the probability l

So that Ui, j = mUi-1, j-2 + lUi-1, j if j = 3+4n (nN) , i even (eq.27).

Situation (x*Z*) can arise from: (x-1*A*) with the probability l.

So that Ui, j = lUi-1, j-3 if j = 4+4n (nN) , i even (eq.28).

The equations used to determine odd rows of this triangular table must be deduced from scheme 8 since i-1 is even.

Thus, when i is odd, a situation (x*A*) can arise from: (-1*A*) with the probability l,

(-1*M*) with the probability m,

(+1*M*) with the probability l+m,

(-1*N*) with the probability m,

(+1*N*) with the probability l+m,

(+1*Z*) with the probability 1.0,

so that Ui, j = lUi-1, j+mUi-1, j+1+(l+m)Ui-1, j-3+mUi-1, j+2+(l+m)Ui-1, j-2+Ui-1, j-1 if j=1+4n (nN), i odd (eq.29).

Situation (x*M*) can arise from: (x-1*A*) with the probability m,

(x-1*M*) with the probability k

So that Ui, j = mUi-1, j-1 + kUi-1, j if j = 2+4n (nN) , i odd (eq.30).

Situation (x*N*) can arise from: (x-1*A*) with the probability m,

(x-1*N*) with the probability k

So that Ui, j = mUi-1, j-2 + kUi-1, j if j = 3+4n (nN) , i odd (eq.31).

Situation (x*Z*) can arise from: (x-1*A*) with the probability k.

So that Ui, j = kUi-1, j-3 if j = 4+4n (nN) , i odd (eq.32).

The triangular tables and the curves Pi-2q = f(E) are determined for each value of ee. The evolution of the more probable percentage of rungs formed E() with respect to ee is represented on figure 10 in the article.
